# Supplementary material for: Serum Proteomic Analysis of Cannabis Use Disorder in Male Patients
Source: MDPI journal article supplement (doi:10.3390/molecules26175311), 2021-09-01
Supplement: s1 [file s1]

## Supplementary data:

**Figure S1:** Pathways and canonical pathways identified in the IPA functional analysis.

| Top Canonical Pathways                                                |          |               |
|-----------------------------------------------------------------------|----------|---------------|
| Name                                                                  | p-value  | Overlap       |
| LXR/RXR Activation                                                    | 3.70E-16 | 11.0 % 13/118 |
| FXR/RXR Activation                                                    | 5.78E-16 | 10.7 % 13/122 |
| Acute Phase Response Signaling                                        | 7.15E-14 | 7.4 % 13/176  |
| Atherosclerosis Signaling                                             | 3.87E-07 | 5.6 % 7/126   |
| Production of Nitric Oxide and Reactive Oxygen Species in Macrophages | 4.24E-07 | 4.3 % 8/188   |

  

| Top Networks |                                                                                                                |       |
|--------------|----------------------------------------------------------------------------------------------------------------|-------|
| ID           | Associated Network Functions                                                                                   | Score |
| 1            | Free Radical Scavenging, Cellular Compromise, Inflammatory Response                                            | 52    |
| 2            | Cell-To-Cell Signaling and Interaction, Hematological System Development and Function, Immune Cell Trafficking | 26    |
| 3            | Cancer, Hematological Disease, Immunological Disease                                                           | 17    |
| 4            | Cell Death and Survival, Skeletal and Muscular Disorders, Cancer                                               | 11    |

Figure S2: Gel images (n=10) of the study

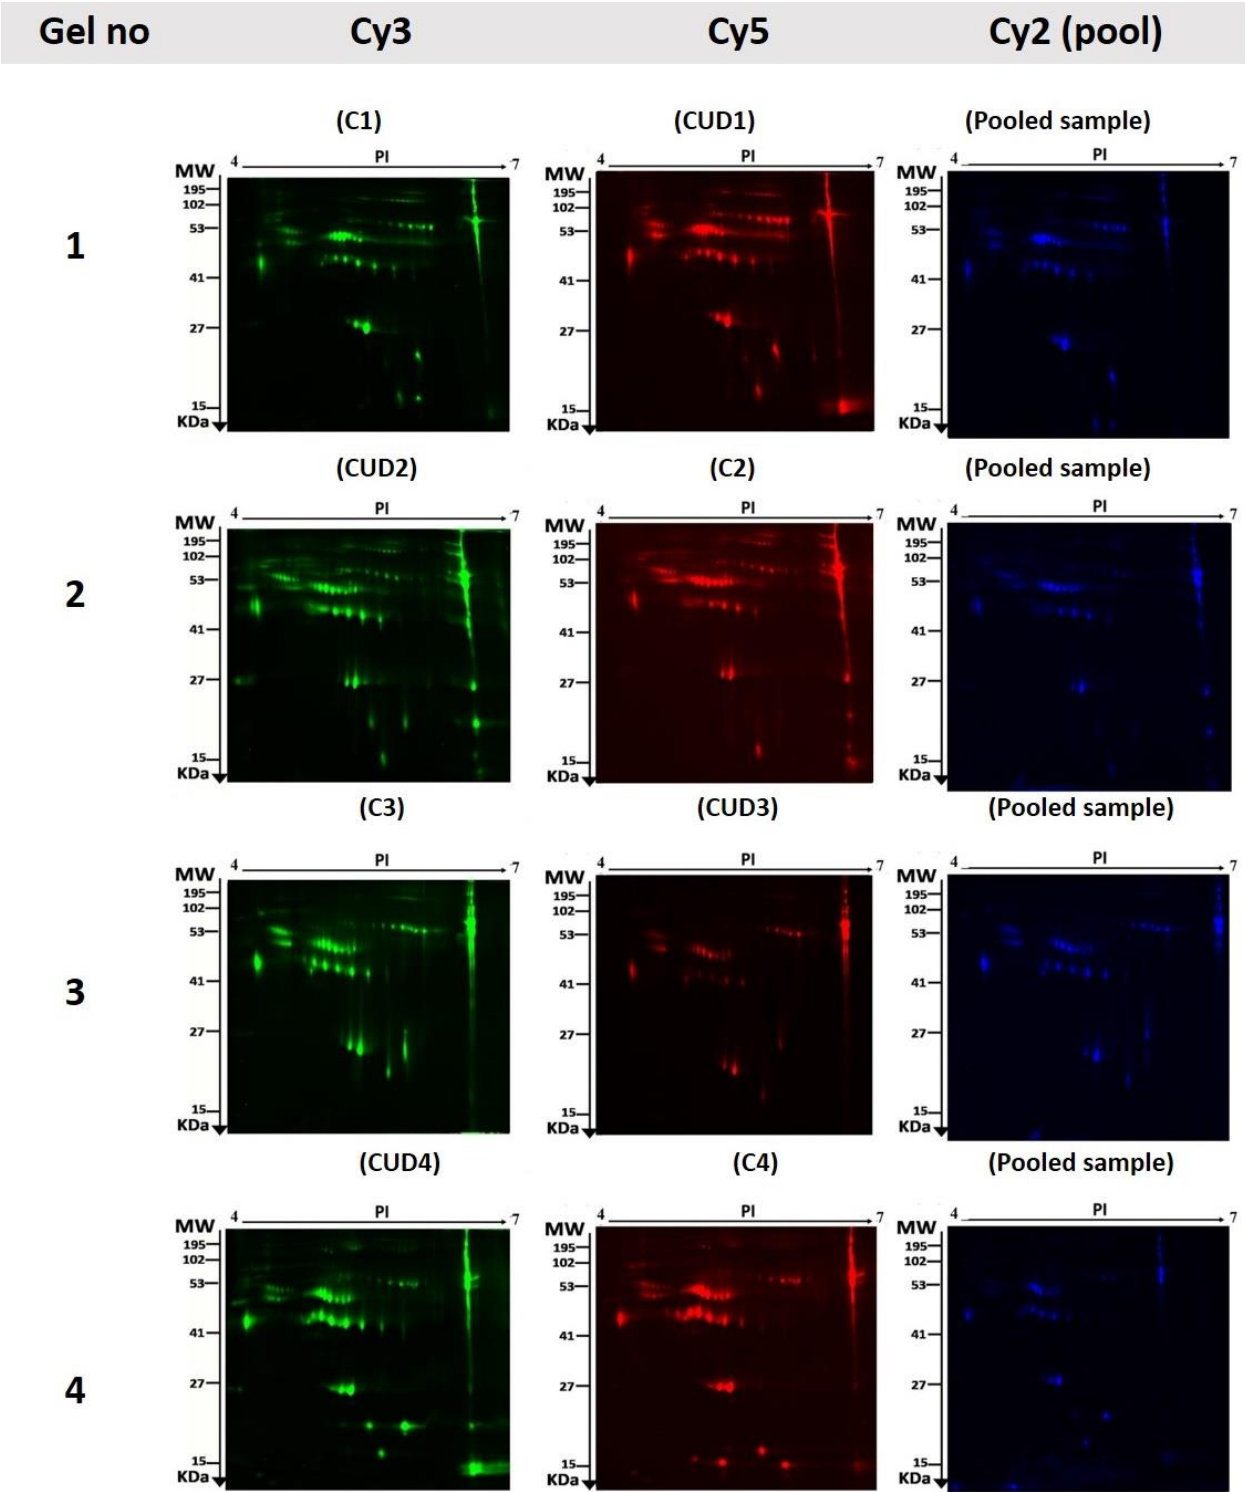

CUD: Cannabis use disorder, C: Control samples

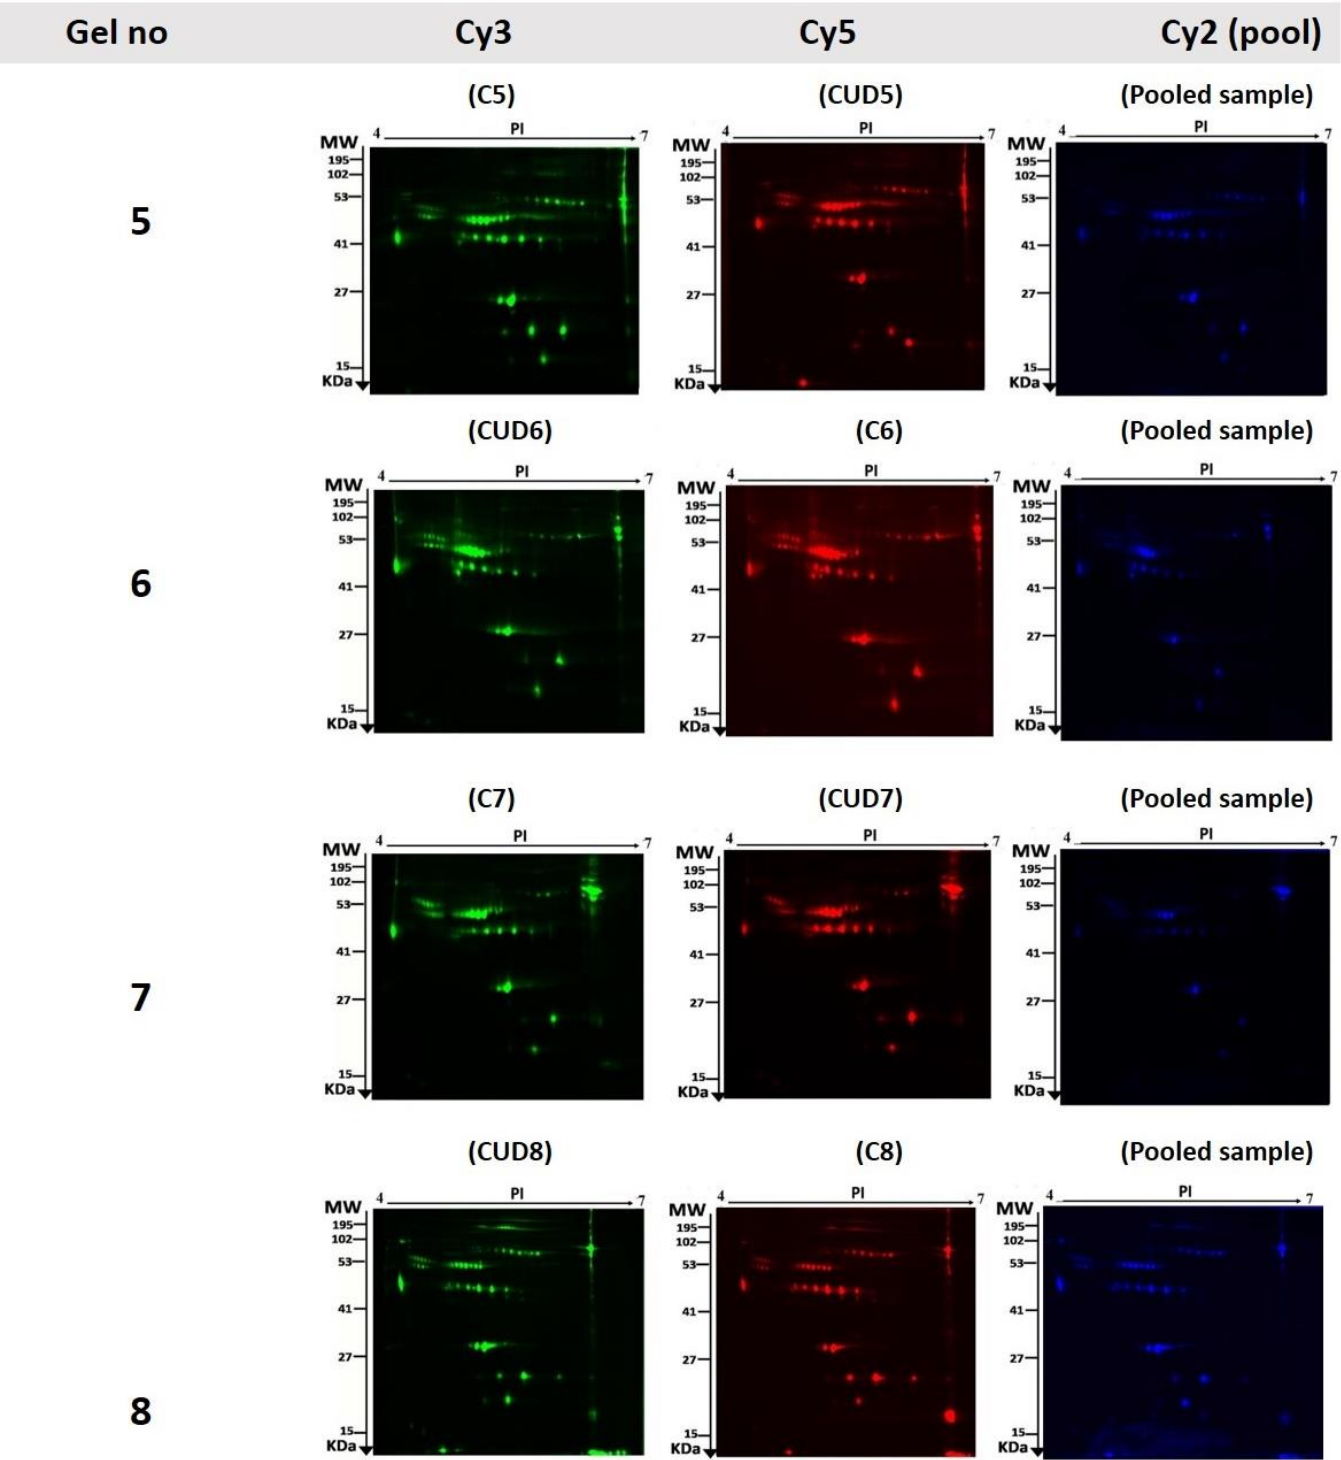

CUD: Cannabis use disorder, C: Control samples

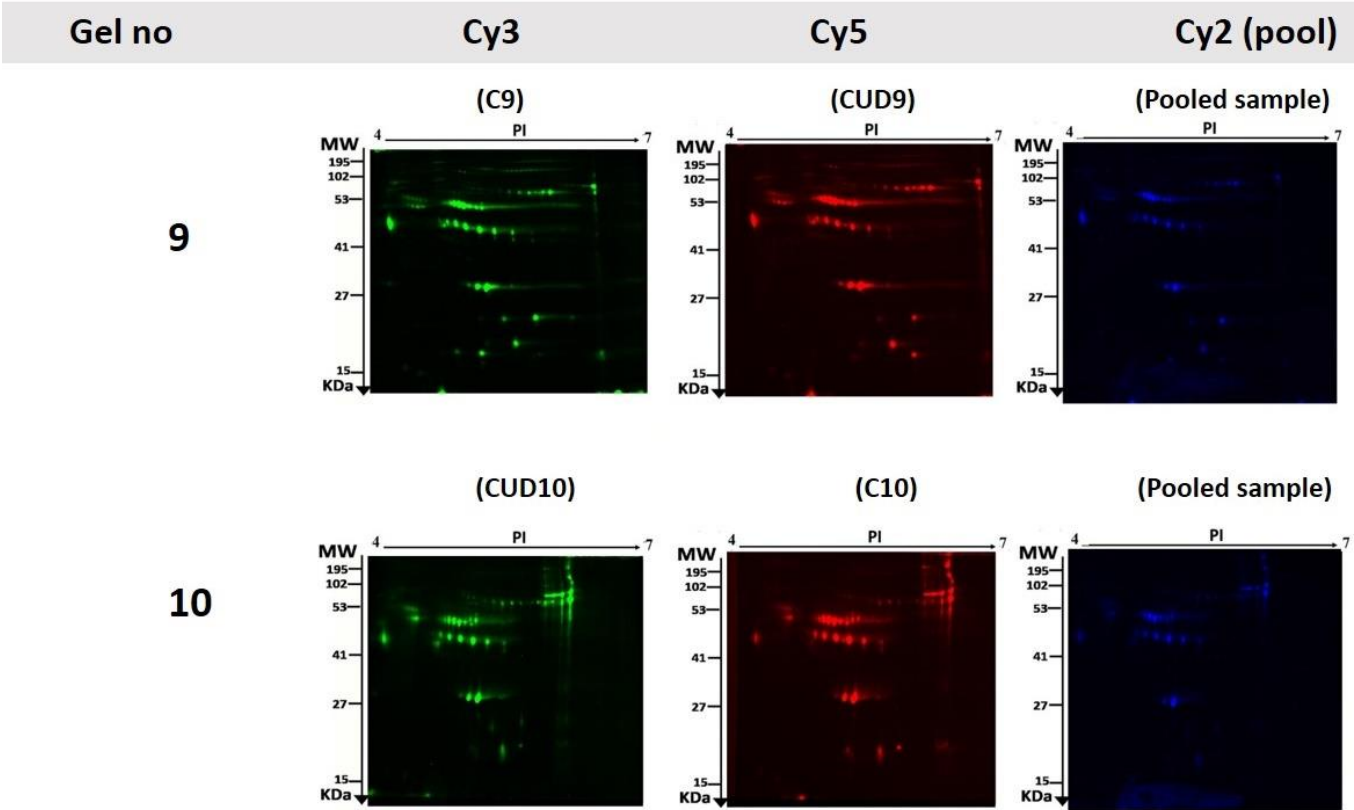

CUD: Cannabis use disorder, C: Control samples

**Figure S3:** Example of the full western blots (not truncated)

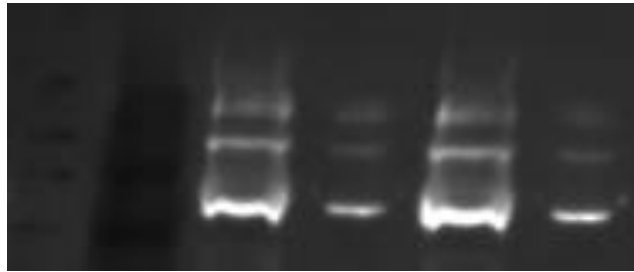

**Table S1:** Dye-switching strategy applied during labeling to avoid dye-specific bias. A total of 20 patient samples were run on 10 2D-PAGE gels. Samples were labeled randomly with Cy3 and Cy5, and a pooled sample was used as an internal standard and was stained with Cy2 (CUD- Cannabis use disorder, C- Control).

| Gel | Cy3   | Cy5  | Cy2           |
|-----|-------|------|---------------|
| 1   | C1    | CUD1 | Pooled sample |
| 2   | CUD2  | C2   | Pooled sample |
| 3   | C3    | CUD3 | Pooled sample |
| 4   | CUD4  | C4   | Pooled sample |
| 5   | C5    | CUD5 | Pooled sample |
| 6   | CUD6  | C6   | Pooled sample |
| 7   | C7    | CUD7 | Pooled sample |
| 8   | CUD8  | C8   | Pooled sample |
| 9   | C9    | CUD9 | Pooled sample |
| 10  | CUD10 | C10  | Pooled sample |

**Table S2:** List of significantly differentially abundant proteins between CUD patients and control samples identified in samples using 2D-DIGE coupled with MS. Protein name, accession number, Mascot score, MS coverage (64%), protein MW, and pI values according to Uniprot database are listed.

| SI no: | Spot No <sup>a</sup> | Accession No <sup>b</sup> | Protein Name                                         | MASCOT ID   | Pi <sup>c</sup> | MW <sup>d</sup> | Cov% | Score <sup>e</sup> |
|--------|----------------------|---------------------------|------------------------------------------------------|-------------|-----------------|-----------------|------|--------------------|
| 1      | 253                  | Q9H792                    | Inactive tyrosine-protein kinase PEAK1               | SG269_HUMAN | 6.46            | 195039          | 15   | 56                 |
| 2      | 1792                 | P02766                    | Transthyretin                                        | TTHY_HUMAN  | 5.52            | 15991           | 69   | 92                 |
| 3      | 202                  | P21580                    | Tumor necrosis factor alpha-induced protein 3        | TNAP3_HUMAN | 8.61            | 91837           | 17   | 60                 |
| 4      | 860                  | P02787                    | Serotransferrin                                      | TRFE_HUMAN  | 6.82            | 79280           | 21   | 143                |
| 5      | 1797                 | P13645                    | Keratin, type I cytoskeletal 10                      | K1C10_HUMAN | 5.13            | 59020           | 22   | 96                 |
| 6      | 1937                 | Q5T6V5                    | Queuosine salvage protein                            | CI064_HUMAN | 5.61            | 39460           | 31   | 57                 |
| 7      | 1082                 | O43300                    | Leucine-rich repeat transmembrane neuronal protein 2 | LRRT2_HUMAN | 8.27            | 59950           | 15   | 62                 |
| 8      | 1226                 | Q9H254                    | Spectrin beta chain, non-erythrocytic 4              | SPTN4_HUMAN | 5.72            | 290005          | 15   | 63                 |
| 9      | 1487                 | P01834                    | Immunoglobulin kappa constant                        | IGKC_HUMAN  | 5.58            | 11773           | 56   | 61                 |
| 10     | 1470                 | P02647                    | Apolipoprotein A-I                                   | APOA1_HUMAN | 5.56            | 30759           | 72   | 160                |
| 11     | 382                  | P02787                    | Serotransferrin                                      | TRFE_HUMAN  | 6.82            | 79280           | 27   | 97                 |
| 12     | 1136                 | O75636                    | Ficolin-3                                            | FCN3_HUMAN  | 6.20            | 33395           | 39   | 80                 |
| 13     | 7                    | P02774                    | Vitamin D-binding protein                            | VTDB_HUMAN  | 5.40            | 54526           | 49   | 151                |
| 14     | 865                  | P00738                    | Haptoglobin                                          | HPT_HUMAN   | 6.13            | 45861           | 27   | 91                 |
| 15     | 864                  | P01024                    | Complement C3                                        | CO3_HUMAN   | 6.02            | 188569          | 16   | 60                 |
| 16     | 1322                 | P00739                    | Haptoglobin-related protein                          | HPTR_HUMAN  | 6.63            | 39518           | 25   | 63                 |
| 17     | 857                  | Q07065                    | Cytoskeleton-associated protein 4                    | CKAP4_HUMAN | 5.63            | 66097           | 18   | 57                 |
| 18     | 385                  | P02787                    | Serotransferrin                                      | TRFE_HUMAN  | 6.82            | 79280           | 62   | 234                |
| 19     | 820                  | Q14585                    | Zinc finger protein 345                              | ZN345_HUMAN | 8.70            | 57229           | 26   | 56                 |
| 20     | 1427                 | Q9BZ29                    | Dedicator of cytokinesis protein 9                   | DOCK9_HUMAN | 7.25            | 238519          | 16   | 65                 |
| 21     | 1120                 | O75648                    | Mitochondrial tRNA-specific 2-thiouridylase 1        | MTU1_HUMAN  | 8.24            | 48284           | 21   | 57                 |
| 22     | 1759                 | P02766                    | Transthyretin                                        | TTHY_HUMAN  | 5.52            | 15991           | 69   | 135                |
| 23     | 1193                 | P04264                    | Keratin, type II cytoskeletal 1                      | K2C1_HUMAN  | 8.15            | 66170           | 34   | 85                 |
| 24     | 108                  | O75121                    | Microfibrillar-associated protein 3-like             | MFA3L_HUMAN | 5.13            | 45750           | 19   | 58                 |

|    |      |        |                                                                             |             |      |        |    |     |
|----|------|--------|-----------------------------------------------------------------------------|-------------|------|--------|----|-----|
| 25 | 185  | P01011 | Alpha-1-antichymotrypsin                                                    | AACT_HUMAN  | 5.33 | 47792  | 24 | 64  |
| 26 | 266  | P02768 | Albumin                                                                     | ALBU_HUMAN  | 5.92 | 71371  | 53 | 133 |
| 27 | 235  | P17039 | Zinc finger protein 30                                                      | ZNF30_HUMAN | 9.33 | 64035  | 34 | 62  |
| 28 | 357  | P08631 | Tyrosine-protein kinase HCK                                                 | HCK_HUMAN   | 6.27 | 60075  | 22 | 56  |
| 29 | 661  | P01009 | Alpha-1-antitrypsin                                                         | A1AT_HUMAN  | 5.37 | 46878  | 17 | 58  |
| 30 | 334  | P02790 | Hemopexin                                                                   | HEMO_HUMAN  | 6.55 | 52385  | 36 | 131 |
| 31 | 450  | P01009 | Alpha-1-antitrypsin                                                         | A1AT_HUMAN  | 5.37 | 46878  | 49 | 133 |
| 32 | 1563 | P18206 | Vinculin                                                                    | VINC_HUMAN  | 5.50 | 124292 | 11 | 666 |
| 33 | 853  | P00738 | Haptoglobin                                                                 | HPT_HUMAN   | 6.13 | 45861  | 36 | 132 |
| 34 | 1448 | Q6ZNG0 | Zinc finger protein 620                                                     | ZN620_HUMAN | 8.64 | 49612  | 22 | 61  |
| 35 | 1473 | Q9HBT8 | Zinc finger protein 286A                                                    | Z286A_HUMAN | 8.64 | 61505  | 22 | 58  |
| 36 | 1231 | P13645 | Keratin, type I cytoskeletal 10                                             | K1C10_HUMAN | 5.13 | 59020  | 28 | 82  |
| 37 | 548  | P02765 | Alpha-2-HS-glycoprotein                                                     | FETUA_HUMAN | 5.43 | 40098  | 33 | 60  |
| 38 | 497  | P01009 | Alpha-1-antitrypsin                                                         | A1AT_HUMAN  | 5.37 | 46878  | 40 | 88  |
| 39 | 1784 | P02753 | Retinol-binding protein 4                                                   | RET4_HUMAN  | 5.76 | 23337  | 76 | 74  |
| 40 | 1475 | Q3L8U1 | Chromodomain-helicase-DNA-binding protein 9                                 | CHD9_HUMAN  | 6.56 | 327986 | 8  | 57  |
| 41 | 1295 | Q969Q6 | Serine/threonine-protein phosphatase 2A regulatory subunit B" subunit gamma | P2R3C_HUMAN | 5.07 | 53567  | 26 | 60  |
| 42 | 1260 | P02647 | Apolipoprotein A-I                                                          | APOA1_HUMAN | 5.56 | 30759  | 73 | 225 |
| 43 | 636  | Q99661 | Kinesin-like protein KIF2C                                                  | KIF2C_HUMAN | 8.03 | 82174  | 18 | 57  |
| 44 | 1962 | P13645 | Keratin, type I cytoskeletal 10                                             | K1C10_HUMAN | 5.13 | 59020  | 17 | 63  |
| 45 | 456  | Q9HAC8 | Ubiquitin domain-containing protein 1                                       | UBTD1_HUMAN | 7.68 | 26150  | 16 | 57  |
| 46 | 1705 | O15226 | NF-kappa-B-repressing factor                                                | NKRF_HUMAN  | 8.94 | 78308  | 16 | 60  |
| 47 | 1132 | Q92896 | Golgi apparatus protein 1                                                   | GSLG1_HUMAN | 6.52 | 138341 | 31 | 61  |
| 48 | 1877 | P20472 | Parvalbumin alpha                                                           | PRVA_HUMAN  | 4.98 | 12051  | 58 | 68  |
| 49 | 504  | Q08999 | Retinoblastoma-like protein 2                                               | RBL2_HUMAN  | 7.27 | 129711 | 26 | 73  |
| 50 | 1484 | P02768 | Albumin                                                                     | ALBU_HUMAN  | 5.92 | 71371  | 80 | 230 |
| 51 | 1277 | O75636 | Ficolin-3                                                                   | FCN3_HUMAN  | 6.20 | 33395  | 44 | 64  |
| 52 | 354  | O60384 | Putative zinc finger protein 861                                            | YS022_HUMAN | 8.91 | 12388  | 59 | 59  |
| 53 | 650  | P01009 | Alpha-1-antitrypsin                                                         | A1AT_HUMAN  | 5.37 | 46878  | 40 | 106 |
| 54 | 1037 | Q14683 | Structural maintenance of chromosomes protein 1A                            | SMC1A_HUMAN | 7.51 | 143771 | 26 | 59  |
| 55 | 1138 | Q6ZN19 | Zinc finger protein 841                                                     | ZN841_HUMAN | 9.48 | 95939  | 28 | 62  |
| 56 | 1669 | P02753 | Retinol-binding protein 4                                                   | RET4_HUMAN  | 5.76 | 23337  | 43 | 70  |
| 57 | 1446 | Q9BV73 | Centrosome-associated protein CEP250                                        | CP250_HUMAN | 5.00 | 281880 | 19 | 58  |
| 58 | 886  | P00738 | Haptoglobin                                                                 | HPT_HUMAN   | 6.13 | 45861  | 19 | 58  |



|    |      |        |                                                      |             |      |        |    |     |
|----|------|--------|------------------------------------------------------|-------------|------|--------|----|-----|
| 59 | 457  | Q96M63 | Coiled-coil domain-containing protein 114            | CC114_HUMAN | 5.87 | 75172  | 24 | 67  |
| 60 | 522  | Q9Y473 | Zinc finger protein 175                              | ZN175_HUMAN | 8.98 | 84009  | 41 | 82  |
| 61 | 1305 | Q12852 | Mitogen-activated protein kinase kinase kinase 12    | M3K12_HUMAN | 6.03 | 94130  | 11 | 56  |
| 62 | 1394 | Q14204 | Cytoplasmic dynein 1 heavy chain 1                   | DYHC1_HUMAN | 6.01 | 534804 | 16 | 68  |
| 63 | 48   | P49792 | E3 SUMO-protein ligase RanBP2                        | RBP2_HUMAN  | 5.85 | 362365 | 14 | 65  |
| 64 | 903  | O95389 | Cellular communication network factor 6              | WISP3_HUMAN | 8.87 | 41319  | 28 | 66  |
| 65 | 28   | Q14624 | Inter-alpha-trypsin inhibitor heavy chain H4         | ITI4_HUMAN  | 6.51 | 103521 | 26 | 81  |
| 66 | 1083 | Q9UKX3 | Myosin-13                                            | MYH13_HUMAN | 5.56 | 224681 | 19 | 65  |
| 67 | 1067 | Q9NQW7 | Xaa-Pro aminopeptidase 1                             | XPP1_HUMAN  | 5.42 | 70557  | 26 | 57  |
| 68 | 423  | Q5R372 | Rab GTPase-activating protein 1-like                 | RBG1L_HUMAN | 5.18 | 70557  | 26 | 57  |
| 69 | 1213 | Q14683 | Structural maintenance of chromosomes protein 1A     | SMC1A_HUMAN | 7.51 | 143771 | 29 | 63  |
| 70 | 1180 | Q8TED0 | U3 small nucleolar RNA-associated protein 15 homolog | UTP15_HUMAN | 9.18 | 58661  | 30 | 70  |
| 71 | 805  | P04637 | Cellular tumor antigen p53                           | P53_HUMAN   | 6.33 | 44196  | 22 | 56  |
| 72 | 388  | P00751 | Complement factor B                                  | CFAB_HUMAN  | 6.67 | 86847  | 36 | 95  |
| 73 | 1106 | Q8TD57 | Dynein heavy chain 3, axonemal                       | DYH3_HUMAN  | 6.04 | 473776 | 14 | 64  |
| 74 | 579  | P02768 | Albumin                                              | ALBU_HUMAN  | 5.92 | 71371  | 48 | 104 |
| 75 | 215  | Q9Y4I1 | Unconventional myosin-Va                             | MYO5A_HUMAN | 8.70 | 216995 | 22 | 64  |
| 76 | 1865 | P02766 | Transthyretin                                        | TTHY_HUMAN  | 5.52 | 15991  | 69 | 58  |
| 77 | 953  | P00738 | Haptoglobin                                          | HPT_HUMAN   | 6.13 | 45861  | 39 | 92  |
| 78 | 528  | P02768 | Albumin                                              | ALBU_HUMAN  | 5.92 | 71371  | 45 | 68  |
| 79 | 1627 | P02647 | Apolipoprotein A-I                                   | APOA1_HUMAN | 5.56 | 30759  | 33 | 76  |
| 80 | 1659 | P02647 | Apolipoprotein A-I                                   | APOA1_HUMAN | 5.56 | 30759  | 69 | 157 |
| 81 | 993  | Q7Z398 | Zinc finger protein 550                              | ZN550_HUMAN | 8.95 | 49491  | 25 | 61  |
| 82 | 562  | P19652 | Alpha-1-acid glycoprotein 2                          | A1AG2_HUMAN | 5.03 | 23873  | 42 | 85  |
| 83 | 974  | P35558 | Phosphoenolpyruvate carboxykinase, cytosolic [GTP]   | PCKGC_HUMAN | 5.80 | 69948  | 23 | 66  |
| 84 | 990  | Q5BJF6 | Outer dense fiber protein 2                          | ODFP2_HUMAN | 7.53 | 96140  | 30 | 59  |
| 85 | 1211 | P04264 | Keratin, type II cytoskeletal 1                      | K2C1_HUMAN  | 8.15 | 66170  | 36 | 90  |
| 86 | 1054 | Q9H792 | Inactive tyrosine-protein kinase PEAK1               | SG269_HUMAN | 6.46 | 195039 | 18 | 71  |
| 87 | 955  | Q5BJF6 | Outer dense fiber protein 2                          | ODFP2_HUMAN | 7.53 | 96140  | 36 | 93  |

|     |      |        |                                                 |             |      |        |    |     |
|-----|------|--------|-------------------------------------------------|-------------|------|--------|----|-----|
| 88  | 2217 | P68871 | Hemoglobin subunit beta                         | HBB_HUMAN   | 6.76 | 16102  | 63 | 57  |
| 89  | 1039 | P78332 | RNA-binding protein 6                           | RBM6_HUMAN  | 5.93 | 129192 | 26 | 70  |
| 90  | 913  | P02538 | Keratin, type II cytoskeletal 6A                | K2C6A_HUMAN | 8.09 | 60239  | 35 | 80  |
| 91  | 604  | Q6AW86 | Zinc finger protein 324B                        | Z324B_HUMAN | 9.78 | 61818  | 34 | 60  |
| 92  | 981  | P06727 | Apolipoprotein A-IV                             | APOA4_HUMAN | 5.28 | 45371  | 41 | 128 |
| 93  | 1908 | P02647 | Apolipoprotein A-I                              | APOA1_HUMAN | 5.56 | 30759  | 49 | 100 |
| 94  | 2323 | P02042 | Hemoglobin subunit delta                        | HBD_HUMAN   | 7.85 | 16159  | 63 | 61  |
| 95  | 481  | Q5R372 | Rab GTPase-activating protein 1-like            | RBG1L_HUMAN | 5.18 | 93366  | 16 | 59  |
| 96  | 623  | Q92608 | Dedicator of cytokinesis protein 2              | DOCK2_HUMAN | 6.43 | 213123 | 16 | 59  |
| 97  | 771  | Q96EH8 | E3 ubiquitin-protein ligase NEURL3              | LINCR_HUMAN | 8.36 | 29626  | 38 | 65  |
| 98  | 341  | Q9P219 | Protein Daple                                   | DAPLE_HUMAN | 5.87 | 229215 | 15 | 70  |
| 99  | 796  | P00738 | Haptoglobin                                     | HPT_HUMAN   | 6.13 | 45861  | 33 | 95  |
| 100 | 987  | Q709C8 | Vacuolar protein sorting-associated protein 13C | VP13C_HUMAN | 6.38 | 424462 | 12 | 68  |
| 101 | 732  | P25311 | Zinc-alpha-2-glycoprotein                       | ZA2G_HUMAN  | 5.57 | 34079  | 37 | 57  |
| 102 | 702  | Q9UM13 | Anaphase-promoting complex subunit 10           | APC10_HUMAN | 9.17 | 21410  | 22 | 63  |
| 103 | 533  | P02774 | Vitamin D-binding protein                       | VTDB_HUMAN  | 5.40 | 54526  | 26 | 69  |
| 104 | 1465 | P17017 | Zinc finger protein 14                          | ZNF14_HUMAN | 9.36 | 77970  | 37 | 67  |
| 105 | 788  | A8TX70 | Collagen alpha-5(VI) chain                      | CO6A5_HUMAN | 6.50 | 291796 | 15 | 58  |
| 106 | 584  | Q8TD57 | Dynein heavy chain 3, axonemal                  | DYH3_HUMAN  | 6.04 | 473776 | 13 | 60  |
| 107 | 1688 | P20472 | Parvalbumin alpha                               | PRVA_HUMAN  | 4.98 | 12051  | 57 | 56  |
| 108 | 633  | P02768 | Albumin                                         | ALBU_HUMAN  | 5.92 | 71371  | 62 | 176 |
| 109 | 709  | Q9NZM1 | Myoferlin                                       | MYOF_HUMAN  | 5.84 | 236100 | 18 | 70  |
| 110 | 198  | P02768 | Albumin                                         | ALBU_HUMAN  | 5.92 | 71371  | 59 | 245 |
| 111 | 743  | P01009 | Alpha-1-antitrypsin                             | A1AT_HUMAN  | 5.37 | 46878  | 40 | 102 |
| 112 | 676  | P02749 | Beta-2-glycoprotein 1                           | APOH_HUMAN  | 8.34 | 39584  | 51 | 58  |
| 113 | 556  | P20929 | Nebulin                                         | NEBU_HUMAN  | 9.11 | 775419 | 14 | 64  |
| 114 | 537  | P02768 | Albumin                                         | ALBU_HUMAN  | 5.92 | 71371  | 53 | 114 |
| 115 | 714  | Q02156 | Protein kinase C epsilon type                   | KPCE_HUMAN  | 6.73 | 84989  | 24 | 71  |
| 116 | 588  | Q96SZ6 | Mitochondrial tRNA methyltransferase CDK5RAP1   | CK5P1_HUMAN | 8.52 | 68501  | 12 | 57  |
| 117 | 275  | Q9Y473 | Zinc finger protein 175                         | ZN175_HUMAN | 8.98 | 84009  | 22 | 58  |
| 118 | 797  | P00738 | Haptoglobin                                     | HPT_HUMAN   | 6.13 | 45861  | 35 | 94  |
| 119 | 768  | O76041 | Nebulette                                       | NEBL_HUMAN  | 7.89 | 116609 | 21 | 62  |
| 120 | 550  | Q8TE73 | Dynein heavy chain 5, axonemal                  | DYH5_HUMAN  | 5.97 | 532504 | 17 | 60  |
| 121 | 549  | P51508 | Zinc finger protein 81                          | ZNF81_HUMAN | 8.96 | 77679  | 29 | 67  |

<sup>a</sup> Spot number.

<sup>b</sup> Protein accession number for SWISSPROT Database.

<sup>c</sup> Theoretical isoelectric point.

<sup>d</sup> Theoretical relative mass.

<sup>e</sup> MASCOT score

**Table S3:** List of 25 proteins with accession numbers depicted in IPA network pathway

| Sl no | Accession No | Protein Name                                            | MASCOT ID   |
|-------|--------------|---------------------------------------------------------|-------------|
| 1     | Q9Y4I1       | Unconventional myosin-Va                                | MYO5A_HUMAN |
| 2     | P13645       | Keratin, type I cytoskeletal 10 (KRT10*)                | K1C10_HUMAN |
| 3     | Q08999       | Retinoblastoma-like protein 2                           | RBL2_HUMAN  |
| 4     | P04637       | Cellular tumor antigen p53 (TP53)                       | P53_HUMAN   |
| 5     | Q9Y473       | Zinc finger protein 175                                 | ZN175_HUMAN |
| 6     | P01011       | Alpha-1-Antichymotrypsin (SERPINA3)                     | AACT_HUMAN  |
| 7     | P18206       | Vinculin (VCL)                                          | VINC_HUMAN  |
| 8     | P08631       | Tyrosine-protein kinase (HCK)                           | HCK_HUMAN   |
| 9     | Q02156       | Protein kinase C epsilon Type (PRKCE)                   | KPCE_HUMAN  |
| 10    | O15226       | NF-kappa-B-repressing factor                            | NKRF_HUMAN  |
| 11    | P21580       | Tumor necrosis factor alpha-induced protein 3 (TNFAIP3) | TNAP3_HUMAN |
| 12    | P02753       | Retinol-binding protein 4 (RBP4)                        | RET4_HUMAN  |
| 13    | P25311       | Zinc-alpha-2-Glycoprotein (AZGP1)                       | ZA2G_HUMAN  |
| 14    | P02766       | Transthyretin (TTR*)                                    | TTHY_HUMAN  |
| 15    | P01024       | Complement C3 (C3)                                      | CO3_HUMAN   |
| 16    | P00751       | Complement factor B (CFB)                               | CFAB_HUMAN  |
| 17    | P02787       | Serotransferrin (TF)                                    | TRFE_HUMAN  |
| 18    | P02768       | Albumin (ALB)                                           | ALBU_HUMAN  |
| 19    | P68871       | Hemoglobin subunit beta                                 | HBB_HUMAN   |
| 20    | P02647       | Apolipoprotein A-I                                      | APOA1_HUMAN |
| 21    | Q8TD57       | Dynein heavy chain 3, Axonemal (DYNC1H1)                | DYH3_HUMAN  |

|    |        |                                                |             |
|----|--------|------------------------------------------------|-------------|
| 22 | P02790 | Hemopexin (HPX)                                | HEMO_HUMAN  |
| 23 | P06727 | Apolipoprotein A-IV                            | APOA4_HUMAN |
| 24 | P00738 | Haptoglobin (HP)                               | HPT_HUMAN   |
| 25 | O95389 | Cellular communication network factor 6 (CCN6) | WISP3_HUMAN |

**Table S4:** List of proteins with accession numbers for the top 5 canonical pathways

|   | CANONICAL PATHWAYS             | ACCESSION NUMBER | PROTEIN NAME                                 |
|---|--------------------------------|------------------|----------------------------------------------|
| 1 | LXR/RXR Activation             | P02765           | Alpha-2-HS-glycoprotein                      |
|   |                                | P02768           | Albumin                                      |
|   |                                | P02647           | Apolipoprotein A-I                           |
|   |                                | P06727           | Apolipoprotein A-IV                          |
|   |                                | P02749           | Beta-2-glycoprotein 1                        |
|   |                                | P01024           | Complement C3                                |
|   |                                | P02774           | Vitamin D-binding protein                    |
|   |                                | P00739           | Haptoglobin-related protein                  |
|   |                                | P02790           | Hemopexin                                    |
|   |                                | Q14624           | Inter-alpha-trypsin inhibitor heavy chain H4 |
|   |                                | P19652           | Alpha-1-acid glycoprotein 2                  |
|   |                                | P02753           | Retinol-binding protein 4                    |
|   |                                | P01009           | Alpha-1-antitrypsin                          |
|   |                                | P02787           | Serotransferrin                              |
|   |                                | P02766           | Transthyretin                                |
| 2 | FXR/RXR Activation             | P02765           | Alpha-2-HS-glycoprotein                      |
|   |                                | P02768           | Albumin                                      |
|   |                                | P02647           | Apolipoprotein A-I                           |
|   |                                | P06727           | Apolipoprotein A-IV                          |
|   |                                | P02749           | Beta-2-glycoprotein 1                        |
|   |                                | P01024           | Complement C3                                |
|   |                                | P02774           | Vitamin D-binding protein                    |
|   |                                | P00739           | Haptoglobin-related protein                  |
|   |                                | P02790           | Hemopexin                                    |
|   |                                | Q14624           | Inter-alpha-trypsin inhibitor heavy chain H4 |
|   |                                | P19652           | Alpha-1-acid glycoprotein 2                  |
|   |                                | P02753           | Retinol-binding protein 4                    |
|   |                                | P01009           | Alpha-1-antitrypsin                          |
|   |                                | P02787           | Serotransferrin                              |
|   |                                | P02766           | Transthyretin                                |
| 3 | Acute Phase Response Signaling | P02765           | Alpha-2-HS-glycoprotein                      |
|   |                                | P02768           | Albumin                                      |
|   |                                | P02647           | Apolipoprotein A-I                           |

|   |                                                               |        |                                              |
|---|---------------------------------------------------------------|--------|----------------------------------------------|
|   |                                                               | P02749 | Beta-2-glycoprotein 1                        |
|   |                                                               | P01024 | Complement C3                                |
|   |                                                               | P00751 | Complement factor B                          |
|   |                                                               | P00738 | Haptoglobin                                  |
|   |                                                               | P02790 | Hemopexin                                    |
|   |                                                               | Q14624 | Inter-alpha-trypsin inhibitor heavy chain H4 |
|   |                                                               | P19652 | Alpha-1-acid glycoprotein 2                  |
|   |                                                               | P02753 | Retinol-binding protein 4                    |
|   |                                                               | P01009 | Alpha-1-antitrypsin                          |
|   |                                                               | P01011 | Alpha-1- antichymotrypsin                    |
|   |                                                               | P02787 | Serotransferrin                              |
|   |                                                               | P02766 | Transthyretin                                |
| 4 | <b>Production of Nitric oxide and Reactive Oxygen Species</b> | P02768 | Albumin                                      |
|   |                                                               | P02647 | Apolipoprotein A-I                           |
|   |                                                               | P06727 | Apolipoprotein A-IV                          |
|   |                                                               | Q12852 | Mitogen-activated protein kinase kinase 12   |
|   |                                                               | P19652 | Alpha-1-acid glycoprotein 2                  |
|   |                                                               | Q02156 | Protein kinase C epsilon type                |
|   |                                                               | P02753 | Retinol-binding protein 4                    |
|   |                                                               | P01009 | Alpha-1-antitrypsin                          |
| 5 | <b>Atherosclerosis Signaling</b>                              | P02768 | Albumin                                      |
|   |                                                               | P02647 | Apolipoprotein A-I                           |
|   |                                                               | P06727 | Apolipoprotein A-IV                          |
|   |                                                               | Q92896 | Golgi apparatus protein 1                    |
|   |                                                               | P19652 | Alpha-1-acid glycoprotein 2                  |
|   |                                                               | P02753 | Retinol-binding protein 4                    |
|   |                                                               | P01009 | Alpha-1-antitrypsin                          |
